# Supplementary material for: Investigation of the thermal and conductive properties of oxalic acid salts with planar and undulating proton-conducting layers
Source: Royal Society of Chemistry journal article supplement (doi:10.1039/c9ce01397k), 2020-01-01
Supplement: c9ce01397k1.pdf [file c9ce01397k1.pdf]

### Supplementary materials

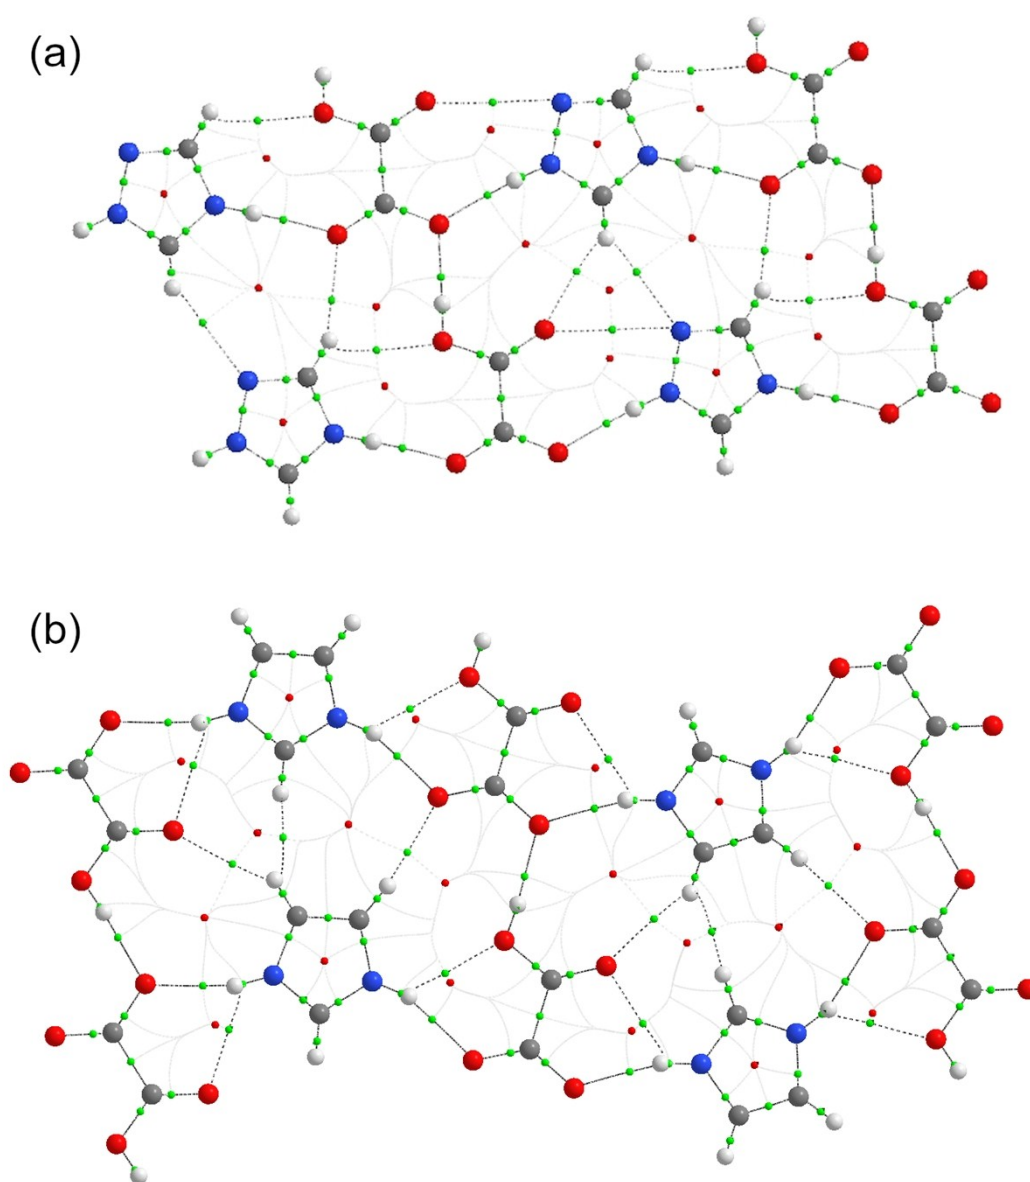

**Figure S1** Molecular graphs (QTAIM) of TriOX (a) and ImiOX (b) salts bound through hydrogen bonds. Green circles correspond to bond critical points (BCP).
